# Supplementary material for: Phylogenetic Analysis and Emerging Drug Resistance against Different Nucleoside Analogues in Hepatitis B Virus Positive Patients
Source: MDPI journal article supplement (doi:10.3390/microorganisms11112622), 2023-10-24
Supplement: s1 [file s1]

**Table S1: Viral Load of all the study cohort.**

| Patient ID | Viral load IU/mL  |
|------------|-------------------|
| 1          | $5.2 \times 10^4$ |
| 2          | $3.2 \times 10^6$ |
| 3          | $3.5 \times 10^6$ |
| 4          | $3.5 \times 10^4$ |
| 5          | $3.0 \times 10^4$ |
| 6          | $5.6 \times 10^4$ |
| 7          | $3.6 \times 10^6$ |
| 8          | $3.8 \times 10^4$ |
| 9          | $5.4 \times 10^5$ |
| 10         | $4.6 \times 10^4$ |
| 11         | $6.4 \times 10^6$ |
| 12         | $5.0 \times 10^4$ |
| 13         | $5.2 \times 10^4$ |
| 14         | $3.3 \times 10^4$ |
| 15         | $4.8 \times 10^4$ |
| 16         | $3.5 \times 10^5$ |
| 17         | $4.2 \times 10^4$ |
| 18         | $3.6 \times 10^5$ |
| 19         | $6.0 \times 10^4$ |
| 20         | $5.1 \times 10^6$ |
| 21         | $3.2 \times 10^5$ |
| 22         | $5.6 \times 10^5$ |
| 23         | $6.8 \times 10^5$ |
| 24         | $4.5 \times 10^5$ |
| 25         | $3.4 \times 10^6$ |
| 26         | $5.6 \times 10^7$ |
| 27         | $5.3 \times 10^3$ |
| 28         | $4.0 \times 10^3$ |
| 29         | $3.2 \times 10^6$ |
| 30         | $3.0 \times 10^4$ |
| 31         | $3.9 \times 10^6$ |
| 32         | $3.0 \times 10^5$ |
| 33         | $6.3 \times 10^4$ |
| 34         | $5.2 \times 10^6$ |
| 35         | $4.4 \times 10^4$ |
| 36         | $4.9 \times 10^4$ |
| 37         | $3.3 \times 10^5$ |
| 38         | $3.8 \times 10^4$ |
| 39         | $4.8 \times 10^5$ |
| 40         | $4.0 \times 10^4$ |

**Table S2: Sequences generated from current study along with accession numbers and urls.**

| <b>S.no</b> | <b>Submission ID</b>   | <b>Accession Number</b> | <b>URLS</b>                                                                                               |
|-------------|------------------------|-------------------------|-----------------------------------------------------------------------------------------------------------|
| 1           | BankIt2162064<br>Seq1  | MK213855                | <a href="https://www.ncbi.nlm.nih.gov/nuccore/MK213855">https://www.ncbi.nlm.nih.gov/nuccore/MK213855</a> |
| 2           | BankIt2162064<br>Seq2  | MK213856                | <a href="https://www.ncbi.nlm.nih.gov/nuccore/MK213856">https://www.ncbi.nlm.nih.gov/nuccore/MK213856</a> |
| 3           | BankIt2162064<br>Seq3  | MK213857                | <a href="https://www.ncbi.nlm.nih.gov/nuccore/MK213857">https://www.ncbi.nlm.nih.gov/nuccore/MK213857</a> |
| 4           | BankIt2162064<br>Seq4  | MK213858                | <a href="https://www.ncbi.nlm.nih.gov/nuccore/MK213858">https://www.ncbi.nlm.nih.gov/nuccore/MK213858</a> |
| 5           | BankIt2162064<br>Seq5  | MK213859                | <a href="https://www.ncbi.nlm.nih.gov/nuccore/MK213859">https://www.ncbi.nlm.nih.gov/nuccore/MK213859</a> |
| 6           | BankIt2162064<br>Seq6  | MK213860                | <a href="https://www.ncbi.nlm.nih.gov/nuccore/MK213860">https://www.ncbi.nlm.nih.gov/nuccore/MK213860</a> |
| 7           | BankIt2162064<br>Seq7  | MK213861                | <a href="https://www.ncbi.nlm.nih.gov/nuccore/MK213861">https://www.ncbi.nlm.nih.gov/nuccore/MK213861</a> |
| 8           | BankIt2162064<br>Seq8  | MK213862                | <a href="https://www.ncbi.nlm.nih.gov/nuccore/MK213862">https://www.ncbi.nlm.nih.gov/nuccore/MK213862</a> |
| 9           | BankIt2162064<br>Seq9  | MK213863                | <a href="https://www.ncbi.nlm.nih.gov/nuccore/MK213863">https://www.ncbi.nlm.nih.gov/nuccore/MK213863</a> |
| 10          | BankIt2162064<br>Seq10 | MK213864                | <a href="https://www.ncbi.nlm.nih.gov/nuccore/MK213864">https://www.ncbi.nlm.nih.gov/nuccore/MK213864</a> |
| 11          | BankIt2162064<br>Seq11 | MK213865                | <a href="https://www.ncbi.nlm.nih.gov/nuccore/MK213865">https://www.ncbi.nlm.nih.gov/nuccore/MK213865</a> |
| 12          | BankIt2162064<br>Seq12 | MK213866                | <a href="https://www.ncbi.nlm.nih.gov/nuccore/MK213866">https://www.ncbi.nlm.nih.gov/nuccore/MK213866</a> |
| 13          | BankIt2162064<br>Seq13 | MK213867                | <a href="https://www.ncbi.nlm.nih.gov/nuccore/MK213867">https://www.ncbi.nlm.nih.gov/nuccore/MK213867</a> |
| 14          | BankIt2162064<br>Seq14 | MK213868                | <a href="https://www.ncbi.nlm.nih.gov/nuccore/MK213868">https://www.ncbi.nlm.nih.gov/nuccore/MK213868</a> |
| 15          | BankIt2162064<br>Seq15 | MK213879                | <a href="https://www.ncbi.nlm.nih.gov/nuccore/MK213869">https://www.ncbi.nlm.nih.gov/nuccore/MK213869</a> |
| 16          | BankIt2162064<br>Seq16 | MK213870                | <a href="https://www.ncbi.nlm.nih.gov/nuccore/MK213870">https://www.ncbi.nlm.nih.gov/nuccore/MK213870</a> |
| 17          | BankIt2162064<br>Seq17 | MK213871                | <a href="https://www.ncbi.nlm.nih.gov/nuccore/MK213871">https://www.ncbi.nlm.nih.gov/nuccore/MK213871</a> |
| 18          | BankIt2162064<br>Seq18 | MK213872                | <a href="https://www.ncbi.nlm.nih.gov/nuccore/MK213872">https://www.ncbi.nlm.nih.gov/nuccore/MK213872</a> |
| 19          | BankIt2162064<br>Seq19 | MK213873                | <a href="https://www.ncbi.nlm.nih.gov/nuccore/MK213873">https://www.ncbi.nlm.nih.gov/nuccore/MK213873</a> |
| 20          | BankIt2162064<br>Seq20 | MK213874                | <a href="https://www.ncbi.nlm.nih.gov/nuccore/MK213874">https://www.ncbi.nlm.nih.gov/nuccore/MK213874</a> |
| 21          | BankIt2162064<br>Seq21 | MK213875                | <a href="https://www.ncbi.nlm.nih.gov/nuccore/MK213875">https://www.ncbi.nlm.nih.gov/nuccore/MK213875</a> |
| 22          | BankIt2162064<br>Seq22 | MK213876                | <a href="https://www.ncbi.nlm.nih.gov/nuccore/MK213876">https://www.ncbi.nlm.nih.gov/nuccore/MK213876</a> |
| 23          | BankIt2162064<br>Seq23 | MK213877                | <a href="https://www.ncbi.nlm.nih.gov/nuccore/MK213877">https://www.ncbi.nlm.nih.gov/nuccore/MK213877</a> |
| 24          | BankIt2162064<br>Seq24 | MK213878                | <a href="https://www.ncbi.nlm.nih.gov/nuccore/MK213878">https://www.ncbi.nlm.nih.gov/nuccore/MK213878</a> |
| 25          | BankIt2162064<br>Seq25 | MK213879                | <a href="https://www.ncbi.nlm.nih.gov/nuccore/MK213879">https://www.ncbi.nlm.nih.gov/nuccore/MK213879</a> |
| 26          | BankIt2162064<br>Seq26 | MK213880                | <a href="https://www.ncbi.nlm.nih.gov/nuccore/MK213880">https://www.ncbi.nlm.nih.gov/nuccore/MK213880</a> |
| 27          | BankIt2162064<br>Seq27 | MK213881                | <a href="https://www.ncbi.nlm.nih.gov/nuccore/MK213881">https://www.ncbi.nlm.nih.gov/nuccore/MK213881</a> |

|    |                        |          |                                                                                                           |
|----|------------------------|----------|-----------------------------------------------------------------------------------------------------------|
| 28 | BankIt2162064<br>Seq28 | MK213882 | <a href="https://www.ncbi.nlm.nih.gov/nuccore/MK213882">https://www.ncbi.nlm.nih.gov/nuccore/MK213882</a> |
| 29 | BankIt2162064<br>Seq29 | MK213883 | <a href="https://www.ncbi.nlm.nih.gov/nuccore/MK213883">https://www.ncbi.nlm.nih.gov/nuccore/MK213883</a> |
| 30 | BankIt2162064<br>Seq30 | MK213884 | <a href="https://www.ncbi.nlm.nih.gov/nuccore/MK213884">https://www.ncbi.nlm.nih.gov/nuccore/MK213884</a> |
| 31 | BankIt2162064<br>Seq31 | MK213885 | <a href="https://www.ncbi.nlm.nih.gov/nuccore/MK213885">https://www.ncbi.nlm.nih.gov/nuccore/MK213885</a> |
| 32 | BankIt2162064<br>Seq32 | MK213886 | <a href="https://www.ncbi.nlm.nih.gov/nuccore/MK213886">https://www.ncbi.nlm.nih.gov/nuccore/MK213886</a> |
| 33 | BankIt2162064<br>Seq33 | MK213887 | <a href="https://www.ncbi.nlm.nih.gov/nuccore/MK213887">https://www.ncbi.nlm.nih.gov/nuccore/MK213887</a> |
| 34 | BankIt2162064<br>Seq34 | MK213888 | <a href="https://www.ncbi.nlm.nih.gov/nuccore/MK213888">https://www.ncbi.nlm.nih.gov/nuccore/MK213888</a> |
| 35 | BankIt2162064<br>Seq35 | MK213889 | <a href="https://www.ncbi.nlm.nih.gov/nuccore/MK213889">https://www.ncbi.nlm.nih.gov/nuccore/MK213889</a> |
| 36 | BankIt2162064<br>Seq36 | MK213890 | <a href="https://www.ncbi.nlm.nih.gov/nuccore/MK213890">https://www.ncbi.nlm.nih.gov/nuccore/MK213890</a> |
| 37 | BankIt2162064<br>Seq37 | MK213891 | <a href="https://www.ncbi.nlm.nih.gov/nuccore/MK213891">https://www.ncbi.nlm.nih.gov/nuccore/MK213891</a> |
| 38 | BankIt2162064<br>Seq38 | MK213892 | <a href="https://www.ncbi.nlm.nih.gov/nuccore/MK213892">https://www.ncbi.nlm.nih.gov/nuccore/MK213892</a> |
| 39 | BankIt2162064<br>Seq39 | MK213893 | <a href="https://www.ncbi.nlm.nih.gov/nuccore/MK213893">https://www.ncbi.nlm.nih.gov/nuccore/MK213893</a> |
| 40 | BankIt2162064<br>Seq40 | MK213894 | <a href="https://www.ncbi.nlm.nih.gov/nuccore/MK213894">https://www.ncbi.nlm.nih.gov/nuccore/MK213894</a> |

**Table S3: Samples with no drug resistance mutations.**

| <b>S. No</b> | <b>Drug resistance mutations</b> | <b>Therapy Used</b>   | <b>Small Surface Gene Mutation</b> |
|--------------|----------------------------------|-----------------------|------------------------------------|
| 1            | Not detected                     | Tenofovir             | Not detected                       |
| 2            | Not detected                     | Adefovir              | Not detected                       |
| 3            | Not detected                     | Tenofovir             | Not detected                       |
| 4            | Not detected                     | Tenofovir             | Not detected                       |
| 5            | Not detected                     | Tenofovir             | Not detected                       |
| 6            | Not detected                     | Entecavir             | Not detected                       |
| 7            | Not detected                     | Adefovir              | Not detected                       |
| 8            | Not detected                     | Tenofovir             | Not detected                       |
| 9            | Not detected                     | Lamivudine+ tenofovir | Not detected                       |
| 10           | Not detected                     | Lamivudine+ tenofovir | Not detected                       |
| 11           | Not detected                     | Tenofovir             | Not detected                       |
| 12           | Not detected                     | Adefovir              | Not detected                       |
| 13           | Not detected                     | Lamivudine+ tenofovir | Not detected                       |
